# Supplementary material for: Unveiling the Role of the Work Environment in the Quality of Life of Menopausal Physicians and Nurses
Source: MDPI journal article supplement (doi:10.3390/ijerph20186744), 2023-09-12
Supplement: s1 [file s1]

## Supplementary Materials

**Table S1.** Proportion of participants with menopausal symptoms at different age groups

| Symptom                                         | Age categories |            |          | p-value |
|-------------------------------------------------|----------------|------------|----------|---------|
|                                                 | 40-49 yrs.     | 50-54 yrs. | 55+ yrs. |         |
| Vasomotor symptoms                              |                |            |          |         |
| Hot flashes                                     | 32.76%         | 56.1%      | 41.38%   | 0.068   |
| Nights sweats                                   | 26.32%         | 47.62%     | 34.48%   | 0.09    |
| Sweating                                        | 27.59%         | 57.14%     | 27.59%   | 0.005   |
| Psychological symptoms                          |                |            |          |         |
| Being dissatisfied with their personal life     | 32.14%         | 43.9%      | 33.33%   | 0.459   |
| Feeling anxious or nervous                      | 49.09%         | 56.1%      | 34.48%   | 0.199   |
| Experiencing poor memory                        | 51.79%         | 58.54%     | 39.29%   | 0.289   |
| Accomplishing less than they used to            | 45.45%         | 41.03%     | 49.67%   | 0.875   |
| Feeling depressed, down or blue                 | 45.45%         | 50%        | 23.33%   | 0.062   |
| Being impatient with other people               | 51.85%         | 56.41%     | 31.03%   | 0.092   |
| Feelings of wanting to be alone                 | 44.44%         | 45.24%     | 35.71%   | 0.692   |
| Physical symptoms                               |                |            |          |         |
| Flatulence or gas pains                         | 57.14%         | 57.14%     | 46.67%   | 0.601   |
| Aches in the muscles and joints                 | 56.6%          | 58.54%     | 53.57%   | 0.92    |
| Feeling tired or worn out                       | 71.7%          | 74.36%     | 77.78%   | 0.84    |
| Difficulty sleeping                             | 43.64%         | 63.41%     | 60.71%   | 0.114   |
| Aches in the back, neck or head                 | 61.11%         | 64.29%     | 66.67%   | 0.878   |
| Decrease in physical strength                   | 60%            | 72.5%      | 64.29%   | 0.449   |
| Decrease in stamina                             | 63.64%         | 65%        | 72.41%   | 0.709   |
| Feeling a lack of energy                        | 66.04%         | 68.29%     | 65.52%   | 0.963   |
| Dry skin                                        | 66.04%         | 64.29%     | 68.97%   | 0.919   |
| Weight gain                                     | 47.27%         | 65.85%     | 66.67%   | 0.102   |
| Increased facial hair                           | 17.86%         | 26.83%     | 37.93%   | 0.127   |
| Changes in appearance, texture or tone of skin  | 55.56%         | 53.66%     | 58.62%   | 0.919   |
| Feeling bloated                                 | 49.09%         | 53.66%     | 46.67%   | 0.831   |
| Low backache                                    | 68.63%         | 54.76%     | 51.72%   | 0.236   |
| Frequent urination                              | 40%            | 45.24%     | 28.57%   | 0.371   |
| Involuntary urination when laughing or coughing | 27.78%         | 31.71%     | 44.83%   | 0.282   |
| Sexual symptoms                                 |                |            |          |         |
| Change in sexual desire                         | 33.93%         | 50%        | 39.29%   | 0.273   |
| Vaginal dryness during intimacy                 | 24.56%         | 33.33%     | 50%      | 0.064   |
| Avoiding intimacy                               | 41.82%         | 52.5%      | 55.56%   | 0.411   |
